# Supplementary material for: Genetic mapping and QTL analysis for peanut smut resistance
Source: Springer Nature journal article supplement (doi:10.1186/s12870-021-03023-4), 2021-07-02
Supplement: MOESM2 [file 12870_2021_3023_MOESM2_ESM.csv]

#List of 236 SNPs statistically significant (P = 0.01) resulting of a single marker-phenotype association between disease resistance trait and SNP markers.
#Conducted by simple linear regression to asses association between SNPs markers and SmI. All markers with p-value<0.05 was considered associated with phenotype variation.
#Physical position based on the Axiom Arachis2 array design (Clevenger et al. 2018)
Marker	chr	p.value	Physical position (bp)
AX-177637682	A08	5,15E-05	52576684
AX-176818570	A08	5,47E-05	4314674
AX-176805611	A08	6,10E-05	111851182
AX-147229403	A08	8,22E-05	4873972
AX-147212761	A02/B02	0,000190896	2907720
AX-176792382	A08	0,000240296	105903204
AX-176801945	A08	0,000243674	104468847
AX-177640169	A08	0,000253171	103150738
AX-176813878	A08	0,00026665	111251556
AX-176793067	A08	0,000373459	4388602
AX-176809466	A08	0,000373459	4403235
AX-177640532	A08	0,00038226	103237126
AX-177638864	A08	0,000437559	97455577
AX-176802726	A07	0,000491068	115274919
AX-176799959	A08	0,000565781	112950513
AX-176816055	A07	0,00077419	40324562
AX-176801544	A01	0,000792614	121795030
AX-177637427	A08	0,000847539	104195938
AX-176803782	A07	0,000849582	39433852
AX-176820999	A07	0,000904017	100889557
AX-176815271	A07	0,001035695	55283469
AX-176809445	A07	0,001052427	85322664
AX-176818565	A07	0,001059466	55186930
AX-147212854	A02/B02	0,001086192	3563958
AX-176813017	A07	0,001191962	27420405
AX-176813945	A01	0,001241793	121460689
AX-176799573	A07	0,001262132	42955508
AX-177639801	A07	0,001313897	62271988
AX-176802987	A07	0,001418292	19639458
AX-176800287	A08	0,00149842	7520037
AX-177638186	A07	0,001885857	19641821
AX-176820517	A07	0,001926944	114568297
AX-176816092	A07	0,001954979	19640787
AX-176798715	A07	0,002016407	26484577
AX-176815808	A07	0,002087739	92446909
AX-176799386	A08	0,002104217	6872380
AX-176805977	A07	0,002183406	24117720
AX-176807821	B07	0,002197946	30529877
AX-177639631	A07	0,002234888	61298594
AX-176806837	A07	0,002250911	38862807
AX-176814500	A08	0,002296828	3576545
AX-176820439	A08	0,002296828	98689414
AX-176821695	A08	0,002296828	98547513
AX-177638208	A08	0,002296828	98315632
AX-176803609	A01	0,002338463	104121701
AX-177638245	A07	0,002463019	24823943
AX-177637338	B07	0,00248221	32869118
AX-176817825	A07	0,00273915	19637966
AX-176816076	A07	0,002818963	28614251
AX-176808088	A07	0,002826054	27364019
AX-177638207	A08	0,002829794	97835514
AX-176796294	A07	0,002921095	19640950
AX-176805566	A07	0,002934356	28944423
AX-147258679	A07	0,002978044	106274380
AX-147258683	A07	0,002978044	106275534
AX-147258685	A07	0,002978044	106275894
AX-177643132	A07	0,002978044	106275030
AX-177644438	A07	0,002978044	131182920
AX-176792434	A07	0,003075709	19638551
AX-176793162	A07	0,003075709	19643686
AX-176794375	A07	0,003075709	19642232
AX-176794604	A07	0,003075709	19638601
AX-176794658	A07	0,003075709	19640936
AX-176794665	A07	0,003075709	19642386
AX-176795094	A07	0,003075709	19638538
AX-176796369	A07	0,003075709	27362842
AX-176796372	A07	0,003075709	19640240
AX-176796562	A07	0,003075709	19643081
AX-176796640	A07	0,003075709	28179489
AX-176797040	A07	0,003075709	19638659
AX-176797154	A07	0,003075709	19637684
AX-176797254	A07	0,003075709	19640814
AX-176798150	A07	0,003075709	27363412
AX-176798667	A07	0,003075709	19640484
AX-176798775	A07	0,003075709	19642392
AX-176798930	A07	0,003075709	19642017
AX-176799137	A07	0,003075709	19642093
AX-176799444	A07	0,003075709	19642243
AX-176799558	A07	0,003075709	19642480
AX-176799773	A07	0,003075709	19640308
AX-176800900	A07	0,003075709	19640247
AX-176801381	A07	0,003075709	19642289
AX-176801587	A07	0,003075709	19642385
AX-176801743	A07	0,003075709	19640311
AX-176802006	A07	0,003075709	19638931
AX-176802210	A07	0,003075709	19640099
AX-176802515	A07	0,003075709	19640852
AX-176802713	A07	0,003075709	19643540
AX-176803442	A07	0,003075709	19637754
AX-176803760	A07	0,003075709	19639954
AX-176804163	A07	0,003075709	19643753
AX-176804235	A07	0,003075709	27363568
AX-176805924	A07	0,003075709	19640180
AX-176806406	A07	0,003075709	19642919
AX-176806579	A07	0,003075709	19643319
AX-176806596	A07	0,003075709	19642457
AX-176806795	A07	0,003075709	27361575
AX-176807458	A07	0,003075709	19640244
AX-176807804	A07	0,003075709	19640922
AX-176807887	A07	0,003075709	19638276
AX-176808628	A07	0,003075709	19639330
AX-176808802	A07	0,003075709	19639920
AX-176808968	A07	0,003075709	19644214
AX-176810518	A07	0,003075709	19639966
AX-176810637	A07	0,003075709	19639624
AX-176811945	A07	0,003075709	19643347
AX-176812295	A07	0,003075709	19642463
AX-176812902	A07	0,003075709	19642779
AX-176812952	A07	0,003075709	19643559
AX-176813375	A07	0,003075709	19641176
AX-176814269	A07	0,003075709	27644129
AX-176814551	A07	0,003075709	19642265
AX-176814859	A07	0,003075709	19642394
AX-176814915	A07	0,003075709	19639068
AX-176815841	A07	0,003075709	18241987
AX-176815878	A07	0,003075709	19638419
AX-176817071	A07	0,003075709	19643186
AX-176817339	A07	0,003075709	19643922
AX-176818250	A07	0,003075709	19639453
AX-176818514	A07	0,003075709	19640491
AX-176818647	A07	0,003075709	19643594
AX-176820379	A07	0,003075709	19638044
AX-176823508	A07	0,003075709	19641844
AX-176823773	A07	0,003075709	19642844
AX-177637220	A07	0,003075709	19638912
AX-177637282	A07	0,003075709	19638586
AX-177637685	A07	0,003075709	19643617
AX-177637969	A07	0,003075709	27362912
AX-177638153	A07	0,003075709	19640863
AX-177638176	A07	0,003075709	27365504
AX-177638835	A07	0,003075709	19643562
AX-177638848	A07	0,003075709	19643644
AX-177638907	A07	0,003075709	19639561
AX-177639325	A07	0,003075709	27363529
AX-177639396	A07	0,003075709	19641213
AX-177639461	A07	0,003075709	27362795
AX-177639654	A07	0,003075709	27362105
AX-177639758	A07	0,003075709	19640160
AX-177640558	A07	0,003075709	19638180
AX-177644513	A07	0,003075709	19639405
AX-177644575	A07	0,003075709	19639299
AX-176801553	A07	0,003135537	24958364
AX-176806592	A07	0,003135537	30829137
AX-176811582	B02	0,003261408	15978723
AX-177638572	B07	0,003365198	23108944
AX-176793421	A07	0,003377889	54239494
AX-176791404	A08	0,003424309	102291963
AX-176796960	A07	0,003426766	26390001
AX-147228138	A07	0,003476711	28118653
AX-176817947	A07	0,003544378	101858265
AX-176812163	A07	0,003618038	28659304
AX-176806409	A07	0,003666335	19643690
AX-176812424	A07	0,003762047	43976708
AX-176817935	A07	0,003762047	96965539
AX-176800881	A07	0,003797372	19640285
AX-177638957	A07	0,003842348	19641822
AX-176815250	A07	0,003942391	28154366
AX-176817846	A07	0,003942391	28037619
AX-176793385	A07	0,004073999	53299057
AX-176792710	A07	0,004076803	19641649
AX-176801387	A07	0,004119264	49364480
AX-176817932	A07	0,00420455	96048496
AX-176797221	A08	0,004269454	101225100
AX-176808079	A07	0,004278174	19639419
AX-177642385	B09	0,004362213	12659192
AX-176815269	A07	0,004365575	49701881
AX-176794442	B09	0,004471329	13151882
AX-177643146	B09	0,004471329	12518764
AX-147228333	A07	0,004526742	45819429
AX-147228341	A07	0,004526742	45942702
AX-176803234	A07	0,004526742	43817432
AX-176805714	A07	0,004526742	106118827
AX-176807670	A07	0,004526742	102567142
AX-176807772	A07	0,004526742	101547178
AX-177638242	A07	0,004526742	93445772
AX-176807727	A07	0,004540303	19634078
AX-176794984	A01	0,004553155	104070151
AX-177637534	B09	0,004825916	11016521
AX-176806498	B07	0,004830261	7562466
AX-176795278	B07	0,004835662	32658923
AX-177638082	B07	0,004835662	32871663
AX-147228434	A07	0,004874997	54334742
AX-176794504	A07	0,004874997	129311474
AX-176794936	A07	0,004874997	105532652
AX-176799807	A07	0,004874997	103258895
AX-176802597	A07	0,004874997	106146502
AX-176812224	A07	0,004874997	109791309
AX-176814495	A08	0,004910118	126884497
AX-176804678	A07	0,004929293	27815719
AX-176823633	B07	0,004971972	31156944
AX-147258684	A07	0,005101744	106275540
AX-176817941	A07	0,005199901	103194207
AX-176792278	A07	0,005320897	19638262
AX-176796811	A07	0,005320897	19639017
AX-177638946	A07	0,005358853	31006238
AX-176807223	A07	0,005753167	43231088
AX-176802118	A07	0,005806859	72951266
AX-147227779	A07	0,0058716	13714703
AX-177641897	A07	0,005878379	49886183
AX-177640777	A07	0,005879923	31122713
AX-176797598	B07	0,005949829	28207052
AX-176803142	B07	0,005963848	25682989
AX-176799215	A08	0,006024444	132071413
AX-147228228	A07	0,006117866	35350479
AX-177637880	B07	0,006310014	12758016
AX-176800926	A07	0,0063191	27363729
AX-176810227	B03	0,0063548	3732774
AX-176810836	A08	0,006514761	121290612
AX-177638966	A07	0,006544363	47907814
AX-176797133	A07	0,006686541	98689510
AX-177637177	A07	0,00674314	58642890
AX-176807359	A07	0,006812245	27918479
AX-176805027	A07	0,006964176	19640970
AX-176812218	A07	0,00738961	19100209
AX-176815246	A07	0,007629973	23798929
AX-176798213	A07	0,007650587	19641223
AX-176809163	A07	0,007650587	19634082
AX-176805052	A07	0,007677903	30058841
AX-177638107	B07	0,007718117	38604277
AX-176821998	A07	0,007983395	131185894
AX-176794108	A07	0,007987658	19639066
AX-177638786	A07	0,008196192	27363485
AX-176801484	A07	0,008235525	19639611
AX-176824167	A07	0,008235525	19638797
AX-177637731	B07	0,008676704	28000599
AX-176796114	A07	0,008748755	24547647
AX-176793983	A07	0,008762198	19638311
AX-176793953	A07	0,008898268	10048677
AX-176806530	B07	0,009039545	30845972
AX-176803647	B07	0,009048915	31569603
AX-176795007	A07	0,009102416	27363683
AX-176802982	A07	0,009284856	19640454
AX-177644547	B07	0,009338007	17400993
AX-176818629	A07	0,009412418	30058467
AX-176823879	B07	0,009659184	51307513
AX-176795072	A01	0,009998853	104310686
