# Supplementary material for: Genetic mapping and QTL analysis for peanut smut resistance
Source: Springer Nature journal article supplement (doi:10.1186/s12870-021-03023-4), 2021-07-02
Supplement: MOESM5 [file 12870_2021_3023_MOESM5_ESM.csv]

# QTLs detected by year for resistance to peanut smut on a RILs population of Arachis based on a Halley-Knott genome scan QTL detection model. Resistance to peanut smut is estimated for the level of square root transformed smut incidence; aYear of field evaluation of the trait. bLinkage Group. cMap position in Kosambi cM for each LG. dLOD score at QTL peak.
Yeara	LGb	Genetic positionc	LODd
2015	A08	15,2	4,22
	A02/B02	4	2,24
2016	A08	15,2	3,45
	A02/B02	4	2,73
2017	A08	15,2	4
	A02/B02	4	1,49
