# Supplementary material for: Genetic mapping and QTL analysis for peanut smut resistance
Source: Springer Nature journal article supplement (doi:10.1186/s12870-021-03023-4), 2021-07-02
Supplement: MOESM7 [file 12870_2021_3023_MOESM7_ESM.csv]

Analysis of gene content within the physical intervals of the two QTLs qSmIA08 (1.23 Mbp - 6.04 Mbp) and qSmIA02/B02 (3.43 - 4.29 Mbp), based on cv. Tifrunner transcriptome information [27] (https://peanutbase.org). aIdentifier of a gene from the GeneDB database; bDescription of gene family and protein function identifier when available at www.ebi.ac.uk/interpro/; cArachis hypogaea chromosome ID;…
Gene DB identifiera	Gene familyb	Chromosomec	High density transcript in reproduvtive tissuesd	High density transcript within peg basipetal and fruit platee 1e
arahy.H2EMZS	Leucine-rich repeat IPR001611	Arahy.08	?	?
arahy.1VZ0XU	Leucine-rich repeat IPR001611	Arahy.08	?	?
arahy.G3GLY0	Mlo-related protein IPR004326	Arahy.08	?	?
arahy.ZD1HZA	Mlo-related protein IPR004326	Arahy.08	?
arahy.KK00U0	NAC domain IPR003441	Arahy.08	?
arahy.PYV8LV	Mlo-related protein IPR004326	Arahy.08	?	?
arahy.MM7X4M	Leucine-rich repeat receptor-like protein kinase family protein	Arahy.08	?	?
arahy.R41ZPC	LRR and NB-ARC domain disease resistance protein IPR001611	Arahy.12	?	?
arahy.8JIA13	LRR and NB-ARC domain disease resistance protein IPR001611	Arahy.12	?	?
arahy.M9ABLH	Disease resistance protein (TIR-NBS-LRR class) IPR000157	Arahy.12	?	?
arahy.H64XLR	LRR and NB-ARC domain disease resistance protein IPR001611	Arahy.12	?	?
arahy.KB2A5J	LRR and NB-ARC domain disease resistance protein IPR001611	Arahy.12	?	?
arahy.6FL6BZ	LRR and NB-ARC domain disease resistance protein IPR001611	Arahy.12	?	?
arahy.Q0H19F	LRR and NB-ARC domain disease resistance protein IPR000767	Arahy.12	?	?
arahy.Q9VKE2	Putative disease resistance protein At3g14460-like isoform X1	Arahy.12	?	?
arahy.ZRWQ57	LRR and NB-ARC domain disease resistance protein IPR002182	Arahy.12	?	?
arahy.JV8YGH	LRR and NB-ARC domain disease resistance protein IPR002182	Arahy.12	?	?
arahy.IK9KMC	LRR and NB-ARC domain disease resistance protein IPR000767	Arahy.12	?	?
arahy.W26JNR	LRR and NB-ARC domain disease resistance protein IPR000767	Arahy.12	?	?
arahy.BSP416	Disease resistance protein (TIR-NBS-LRR class) IPR000767	Arahy.12	?	?
arahy.VH2EIV	LRR and NB-ARC domain disease resistance protein IPR001611	Arahy.12	?	?
arahy.9TA9MT	Disease resistance protein (TIR-NBS-LRR class) IPR000767	Arahy.12	?	?
arahy.NKRN6N	Disease resistance protein (TIR-NBS-LRR class) IPR000767	Arahy.12	?	?
arahy.4II1C2	Disease resistance protein (TIR-NBS-LRR class) IPR000767	Arahy.12	?	?
arahy.66HKIQ	Disease resistance protein (TIR-NBS-LRR class) IPR000767	Arahy.12	?	?
arahy.NMJE7X	Disease resistance protein (TIR-NBS-LRR class) IPR000767	Arahy.12	?	?
arahy.1DE133	Disease resistance protein (TIR-NBS-LRR class) IPR000767	Arahy.12	?	?
arahy.QREM2V	Disease resistance protein (TIR-NBS-LRR class) IPR000767	Arahy.12	?	?
arahy.DV2E4X	LRR and NB-ARC domain disease resistance protein	Arahy.12	?	?
arahy.CUPK9N	Disease resistance protein (TIR-NBS-LRR class) IPR000767	Arahy.12	?	?
arahy.8U5YS2	LRR and NB-ARC domain disease resistance protein	Arahy.12	?	?
arahy.KD5YG3	Disease resistance protein (TIR-NBS-LRR class) IPR000767	Arahy.12	?	?
arahy.0C19HY	Disease resistance protein (TIR-NBS-LRR class) IPR000767	Arahy.12	?	?
arahy.V6I7WA	Disease resistance protein (TIR-NBS-LRR class) IPR000767	Arahy.12	?	?
arahy.TE7I1T	LRR and NB-ARC domain disease resistance protein	Arahy.12	?	?
arahy.0EHV1A	Disease resistance protein (TIR-NBS-LRR class) IPR000767	Arahy.12	?	?
arahy.KAG5PZ	LRR and NB-ARC domain disease resistance protein IPR002182	Arahy.12
arahy.W2W4JI	Disease resistance protein (TIR-NBS-LRR class)	Arahy.12
arahy.60VTT9	LRR and NB-ARC domain disease resistance protein	Arahy.02	?	?
arahy.AL4TLG	LRR and NB-ARC domain disease resistance protein	Arahy.02	?	?
arahy.HEBF57	disease resistance protein [Glycine max]	Arahy.02	?	?
arahy.SL8FFE	disease resistance protein [Glycine max]	Arahy.02	?	?
arahy.U433IA	disease resistance protein [Glycine max]	Arahy.02	?	?
arahy.V7RGM7	disease resistance protein [Glycine max]	Arahy.02	?	?
arahy.Y56548	disease resistance protein [Glycine max]	Arahy.02	?	?
