# Supplementary material for: Genetic mapping and QTL analysis for peanut smut resistance
Source: BMC Plant Biol. 2021 Jul 2;21:312. doi: 10.1186/s12870-021-03023-4 (PMC8252251; doi:10.1186/s12870-021-03023-4)
Supplement: Supplementary file 1 — Additional file 1: List of 56 distorted markers with up to 4:1 segregation ratio distributed in few discrete clusters on LGs A04, A05, A07, B03 and B04. [file 12870_2021_3023_MOESM1_ESM.csv]

#List of 56 distorted markers with up to 80:20 segregation ratio distributed in discrete clusters on LGs A04, A05, A07, B03 and B04.
#These clusters were considered as segregation distortion regions (SDRs) .
#LG: linkage group after map construction in this manuscript.
#Physical position based on the Axiom Arachis2 array design (Clevenger et al. 2018)
Marker	LG	Physical pos
AX-147219314	A04	7322516
AX-176792711	A04	7428123
AX-147219934	A04	39970368
AX-176793117	A04	81389737
AX-176817179	A04	83508439
AX-176811783	A04	83741388
AX-176808578	A04	84945710
AX-176807331	A04	88795762
AX-176793070	A04	89523549
AX-176796616	A04	94478167
AX-176793394	A04	94791855
AX-176803416	A04	105051294
AX-176802673	A04	114014458
AX-176822693	A04	114154224
AX-176794579	A04	117875288
AX-147221165	A04	119374144
AX-176810160	A04	119408015
AX-176802579	A04	119417930
AX-176800870	A04	119545034
AX-147248386	A04	123656503
AX-176805306	A04	124539854
AX-147248621	A04	128496743
AX-176808654	A04	128699808
AX-176811054	A04	129307175
AX-176817316	A04	129479662
AX-176796174	A05	15450246
AX-176812244	A05	17469431
AX-176803364	A05	17537359
AX-176792516	A05	18124006
AX-177639717	A05	18256661
AX-176803431	A05	18915705
AX-176810269	A05	20131737
AX-176818003	A05	22450498
AX-176823380	A05	27917424
AX-176816005	A07	26578065
AX-176792488	A07	30747543
AX-176813529	B03	16335101
AX-147216237	B03	19457122
AX-176815041	B03	32310567
AX-176793472	B03	82076273
AX-176824252	B03	96162832
AX-176814446	B03	108913899
AX-176820136	B03	110192673
AX-176812836	B03	110850153
AX-176824260	B03	111867944
AX-176818776	B03	115500602
AX-176821580	B03	116122591
AX-176807237	B03	117746962
AX-176813062	B03	119465517
AX-176811750	B03	121862733
AX-147247121	B04	11424470
AX-176817817	B04	21646741
AX-176802690	B04	41548917
AX-176813435	B04	81313988
AX-176797072	B04	101652916
AX-176796035	B04	105357048
